# Supplementary material
Source: MDPI journal article supplement (https://www.mdpi.com/2072-4292/14/11/2521)
Supplement: s1 [file s1 › remotesensing-1691061-supplementary.pdf]

Supplementary materials

# Spatiotemporal Dynamics of NDVI, Soil Moisture and ENSO in Tropical South America

Diana M. Álvarez \* and Germán Poveda

Department of Geosciences and Environment, Universidad Nacional de Colombia, Medellín, Colombia; gpoveda@unal.edu.co

\* Correspondence: gpoveda@unal.edu.co

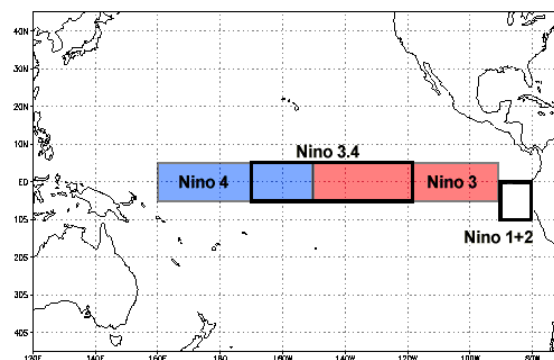

**Figure S1.** Location of the distinctive regions along the tropical Pacific commonly used to study the dynamics of ENSO: Niño 4 (5°N–5°S, 160°E–150°W), Niño 3.4 (5°N–5°S, 170°W–120°W), Niño 3 (5°N–5°S, 150°W–90°W), and Niño 1+2 (0°–10°S, 90°W–80°W). Source: National Oceanic and Atmospheric Administration; <https://www.noaa.gov>.

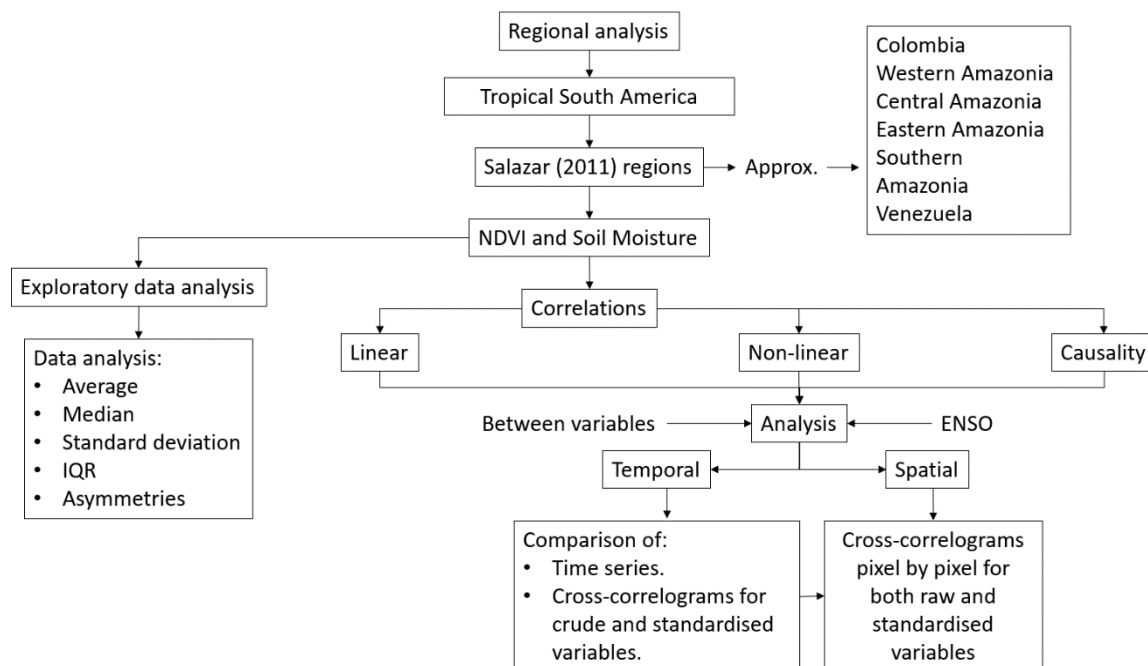

**Figure S2.** Workflow chart used in the study.

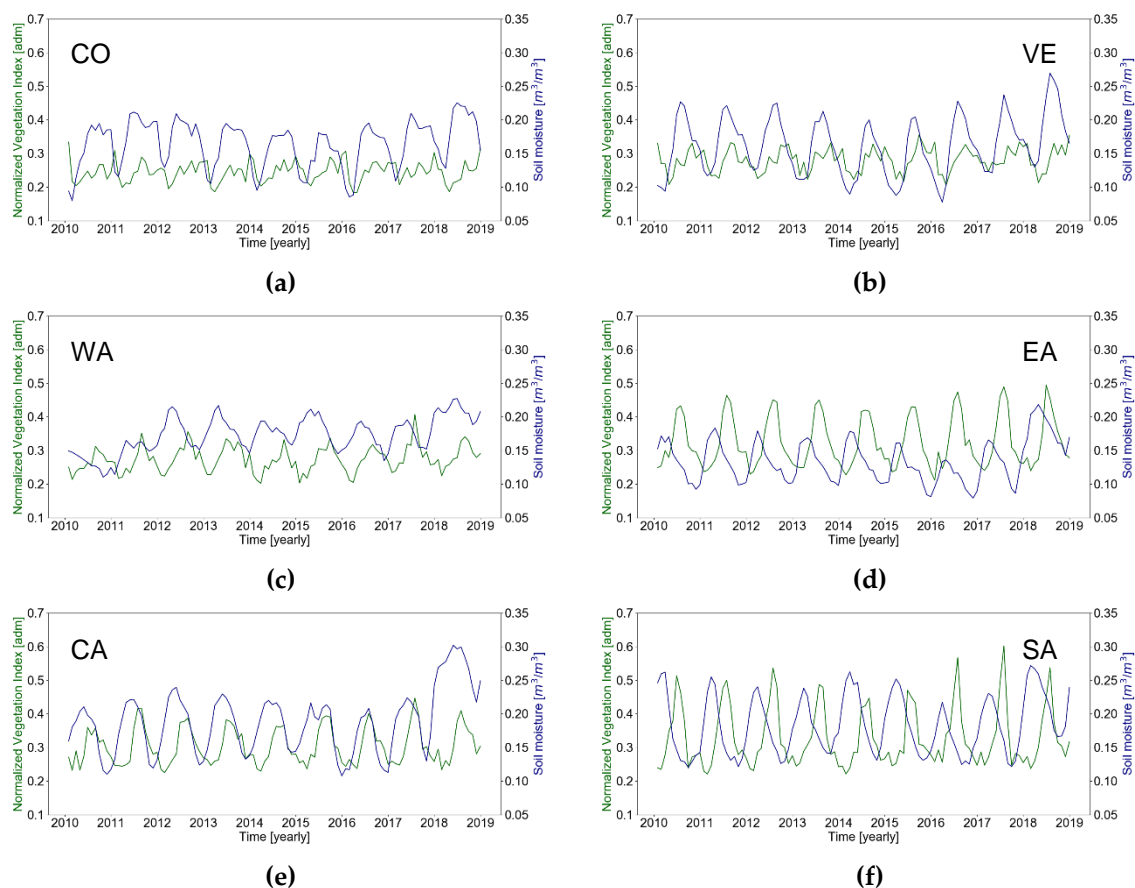

**Figure S3.** Time series of monthly values of NDVI (green) and soil moisture (blue) over the study regions. (a) CO – Colombia, (b) VE – Venezuela, (c) WA – West Amazonia, (d) EA – East Amazonia, (e) CA – Center Amazonia and (f) SA – South Amazonia.

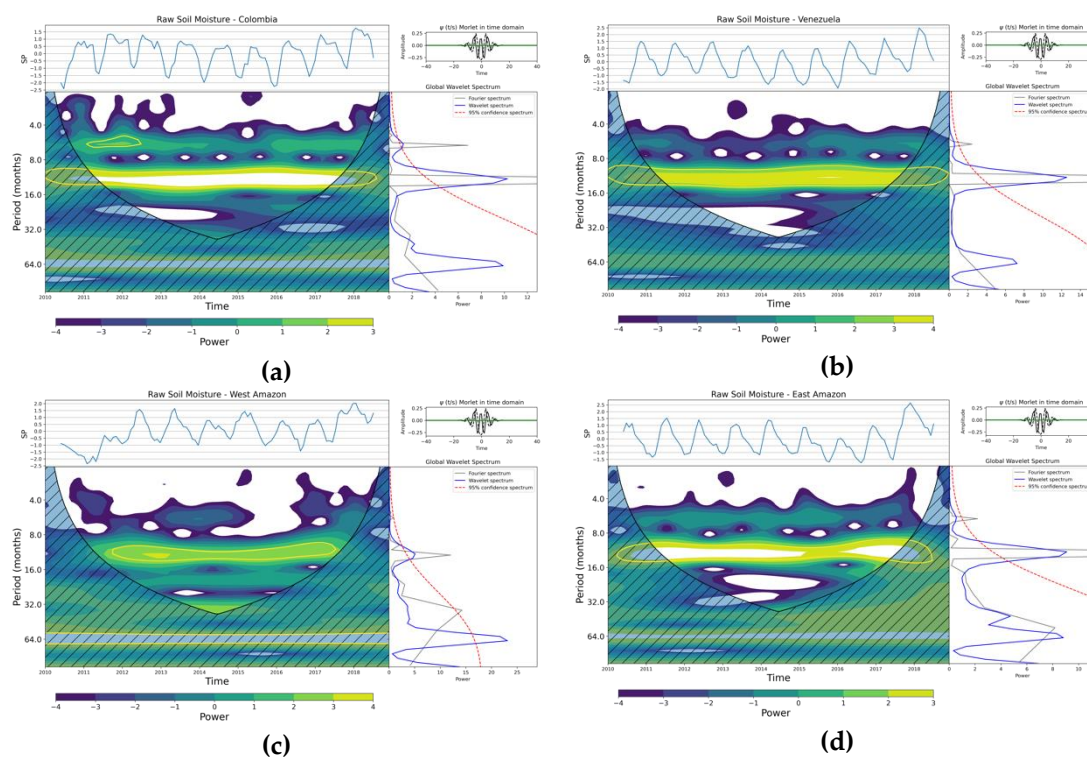

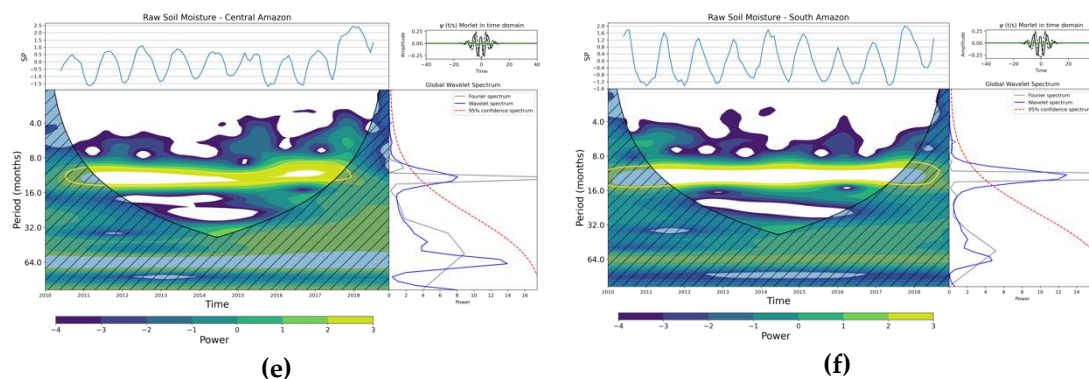

**Figure S4.** SMOS raw series Wavelets: (a) CO – Colombia, (b) VE – Venezuela, (c) WA – West Amazonia, (d) EA – East Amazonia, (e) CA – Center Amazonia and (f) SA – South Amazonia.

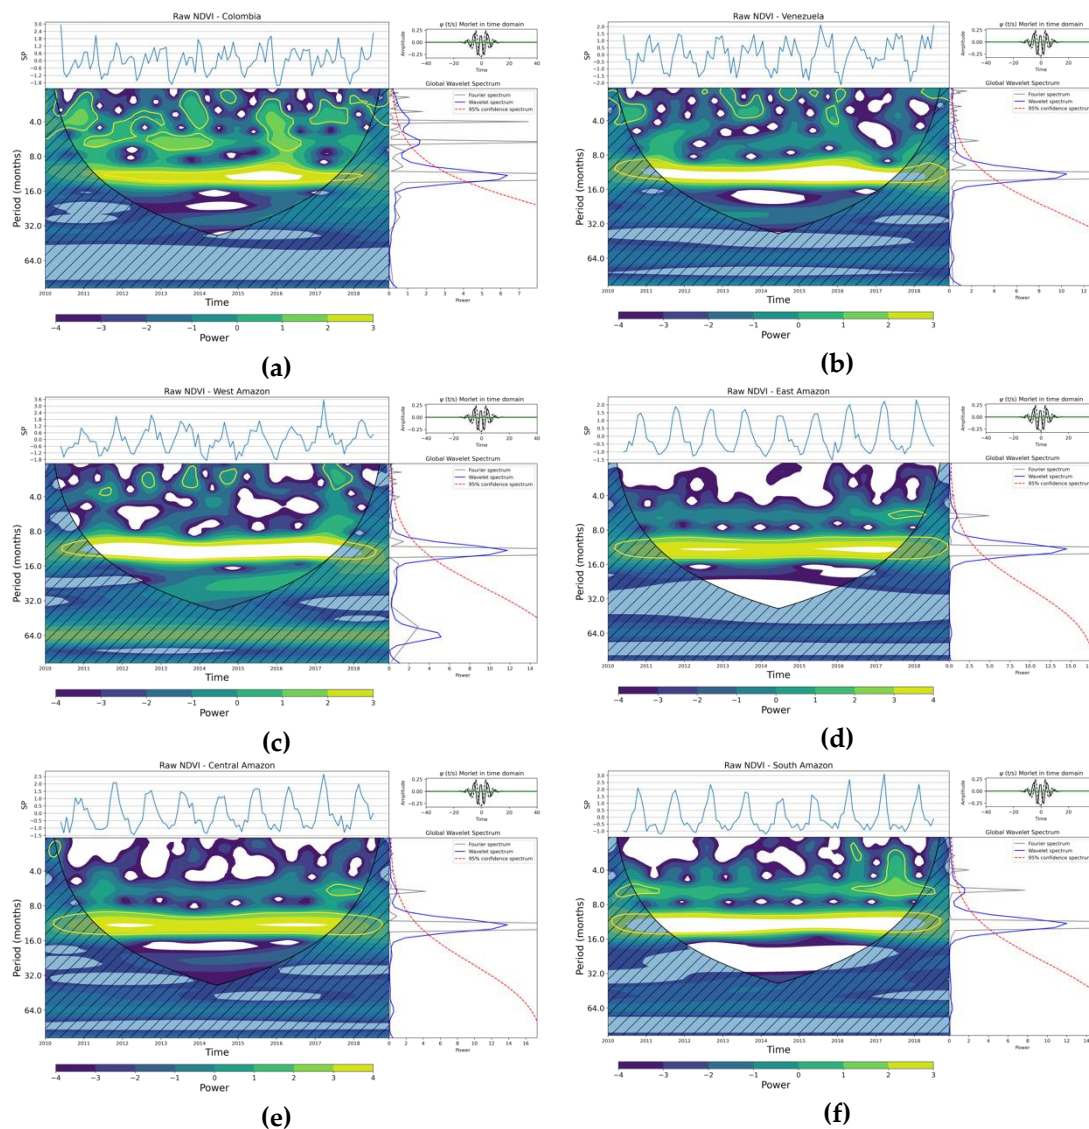

**Figure S5.** NDVI raw series Wavelets: (a) Colombia; (b) Venezuela; (c) West Amazon; (d) East Amazon; (e) Central Amazon; (f) South Amazon.

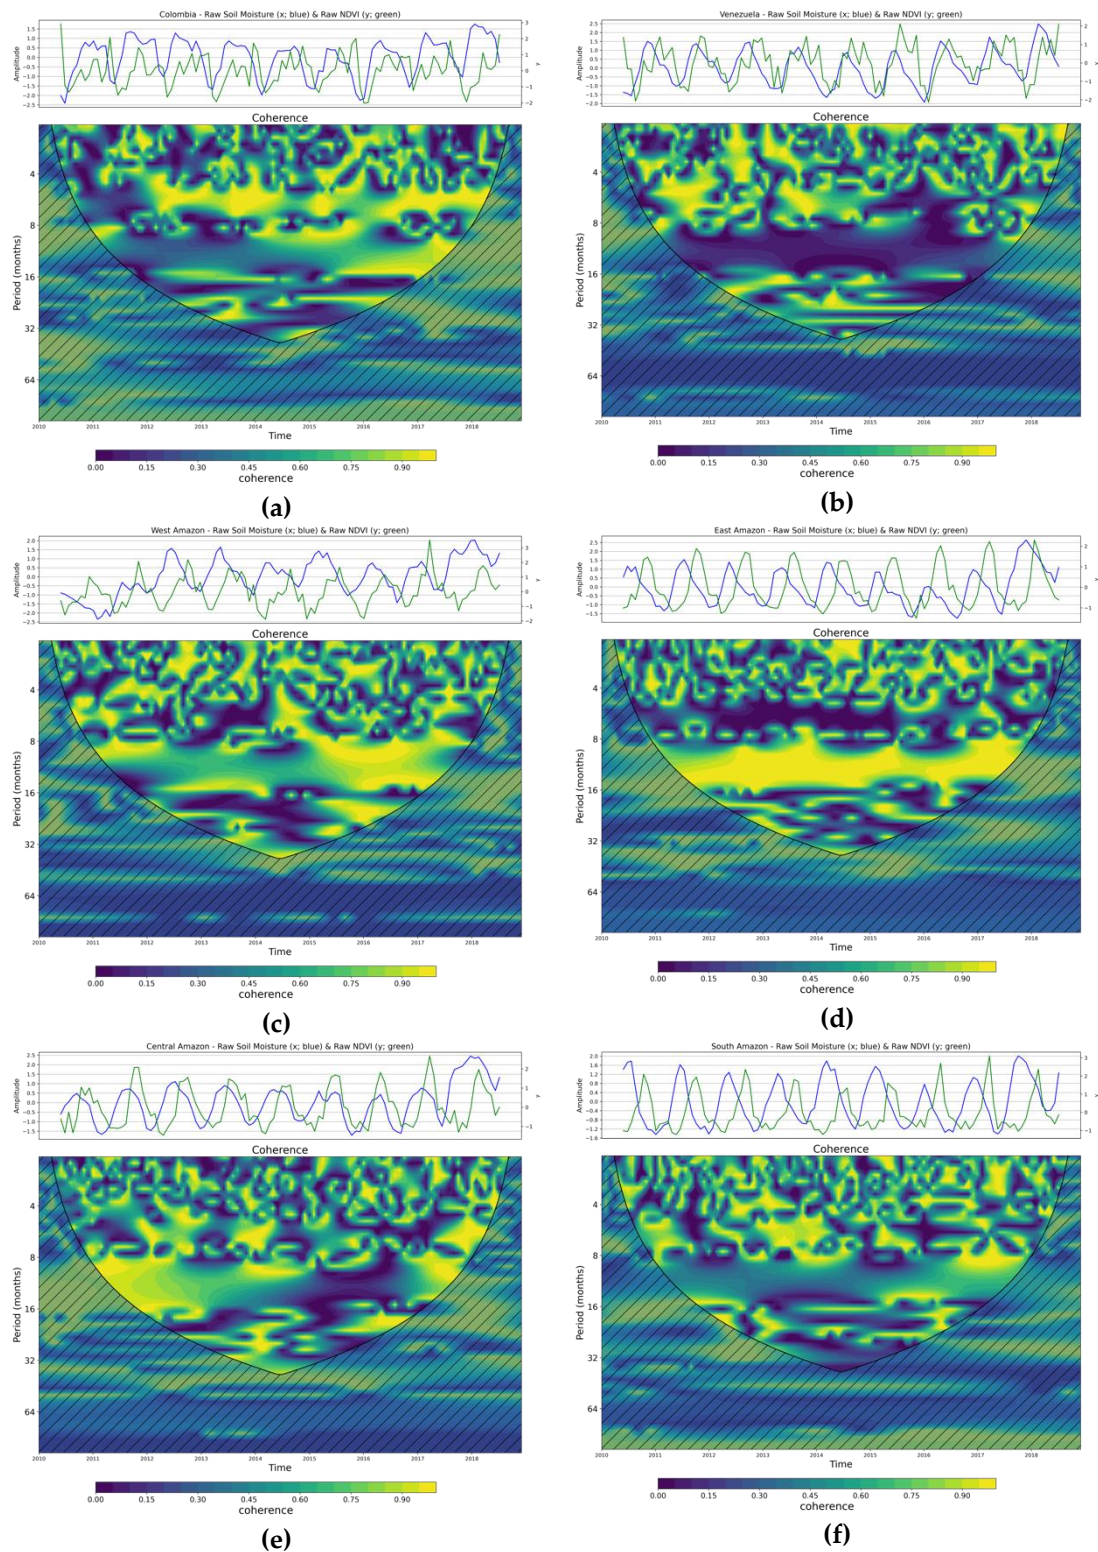

**Figure S6.** Wavelet coherence analyses between raw series of NDVI and SMOS for the six studied regions. The linear color scale results go from deep blue (WCO=0) to yellow (WCO=1): (a) Colombia; (b) Venezuela; (c) West Amazon; (d) East Amazon; (e) Central Amazon; (f) South Amazon.

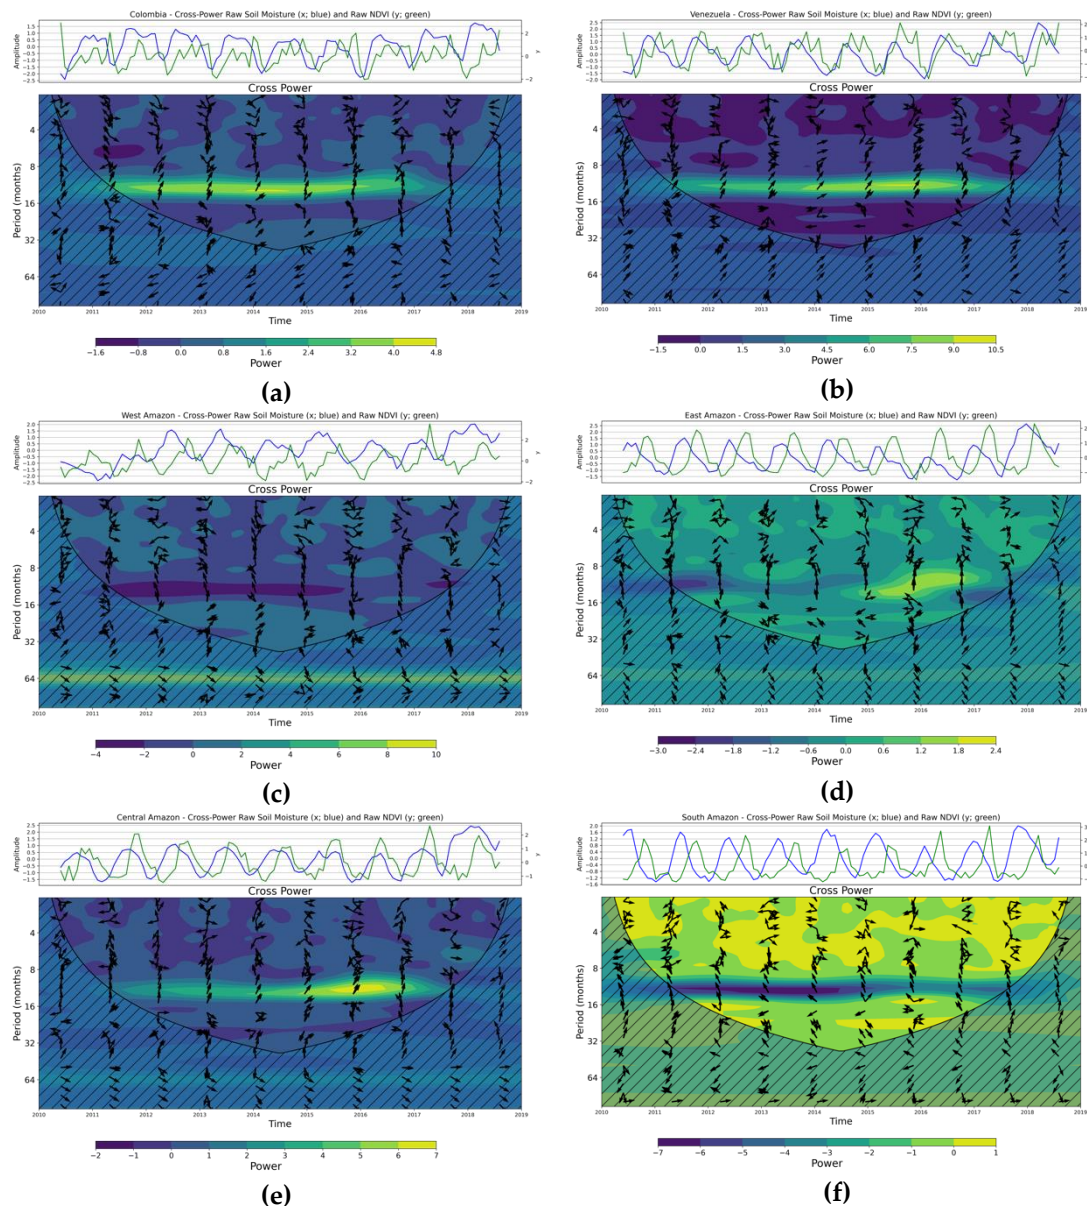

**Figure S7.** Wavelet cross-spectra analyses between raw series of NDVI and SMOS for the six studied regions. Arrows pointing to the right denote that both series are in phase, whereas pointing to the left denote that both series are out of phase: (a) Colombia; (b) Venezuela; (c) West Amazon; (d) East Amazon; (e) Central Amazon; (f) South Amazon.

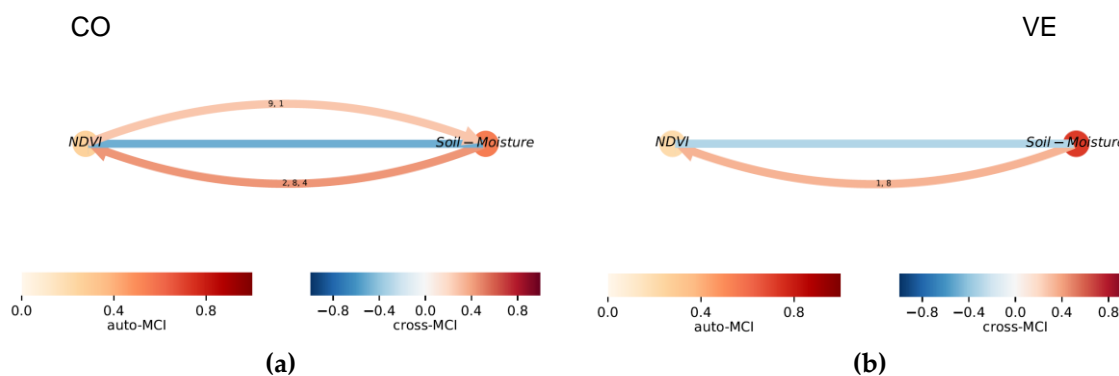

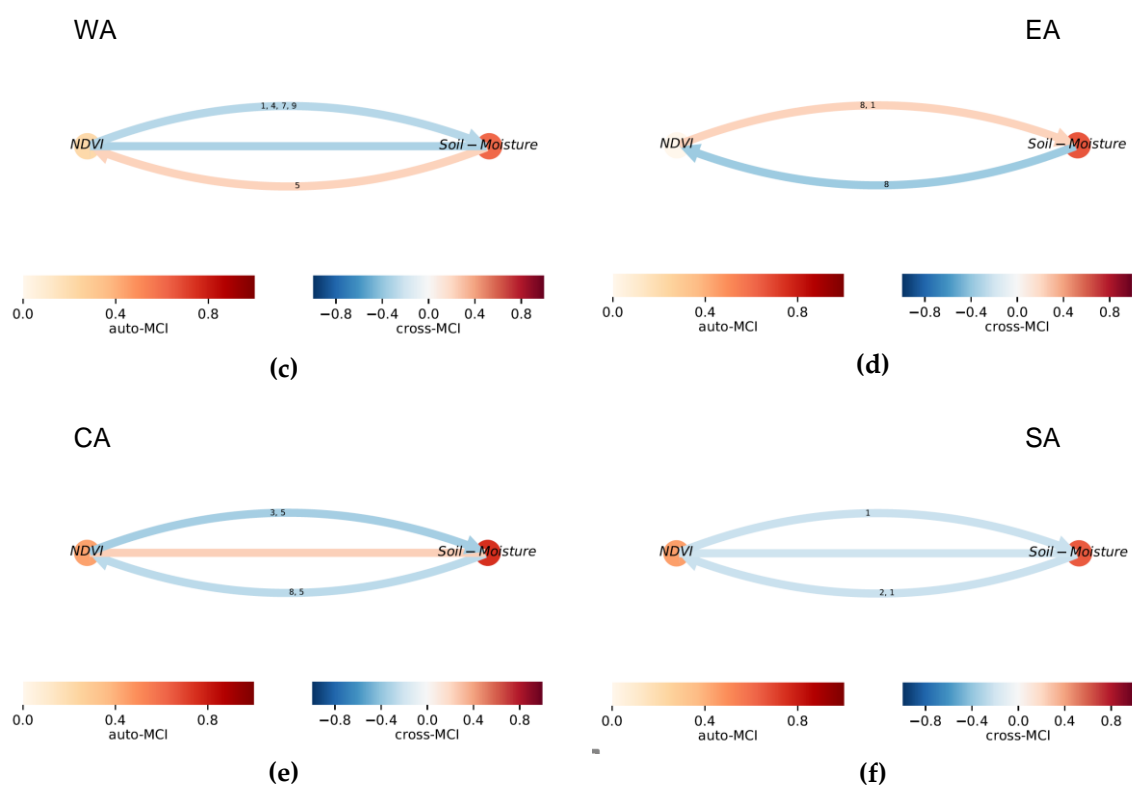

**Figure S8.** Non-linear causality analysis with ParrCorr method between NDVI and SMOS raw series. (a) CO – Colombia, (b) VE – Venezuela, (c) WA – West Amazonia, (d) EA – East Amazonia, (e) CA – Center Amazonia and (f) SA – South Amazonia.

**Table S1.** Non-linear causality correlations and causality results for ParrCorr method.

|                                  |      | CO    | VE     | WA      | CA   | SA   | EA   |
|----------------------------------|------|-------|--------|---------|------|------|------|
| Auto MCI                         | SMOS | 0.6   | 0.8    | 0.6     | 0.8  | 0.6  | 0.6  |
|                                  | NDVI | 0.2   | 0.2    | 0.2     | 0.6  | 0.4  | 0.0  |
| Sim. co-dependency <sup>1</sup>  |      | -0.4  | -0.2   | -0.2    | 0.2  | -0.2 | -    |
| Sim. co-dependency direction     |      | -     | -      | -       | -    | -    | -    |
| Cross-MCI direction <sup>2</sup> |      | Both  | S to N | Both    | Both | Both | Both |
| Cross-MCI                        | SMOS | 0.4   | 0.4    | 0.2     | -0.2 | -0.2 | -0.4 |
|                                  | NDVI | 0.2   | -      | -0.2    | -0.4 | -0.2 | 0.2  |
| Cross-MCI lag*                   | SMOS | 2,8,4 | 1,8    | 5       | 8,5  | 2,1  | 8    |
|                                  | NDVI | 9,1   | -      | 1,4,7,9 | 3,5  | 1    | 8,1  |

<sup>1</sup> Simultaneous non-linear co-dependency, \* Direction refers to N= NDVI and S= SMOS

<sup>2</sup> Cross-MCI lag refers to the lag between both series where a correlation is presented (measured in months).

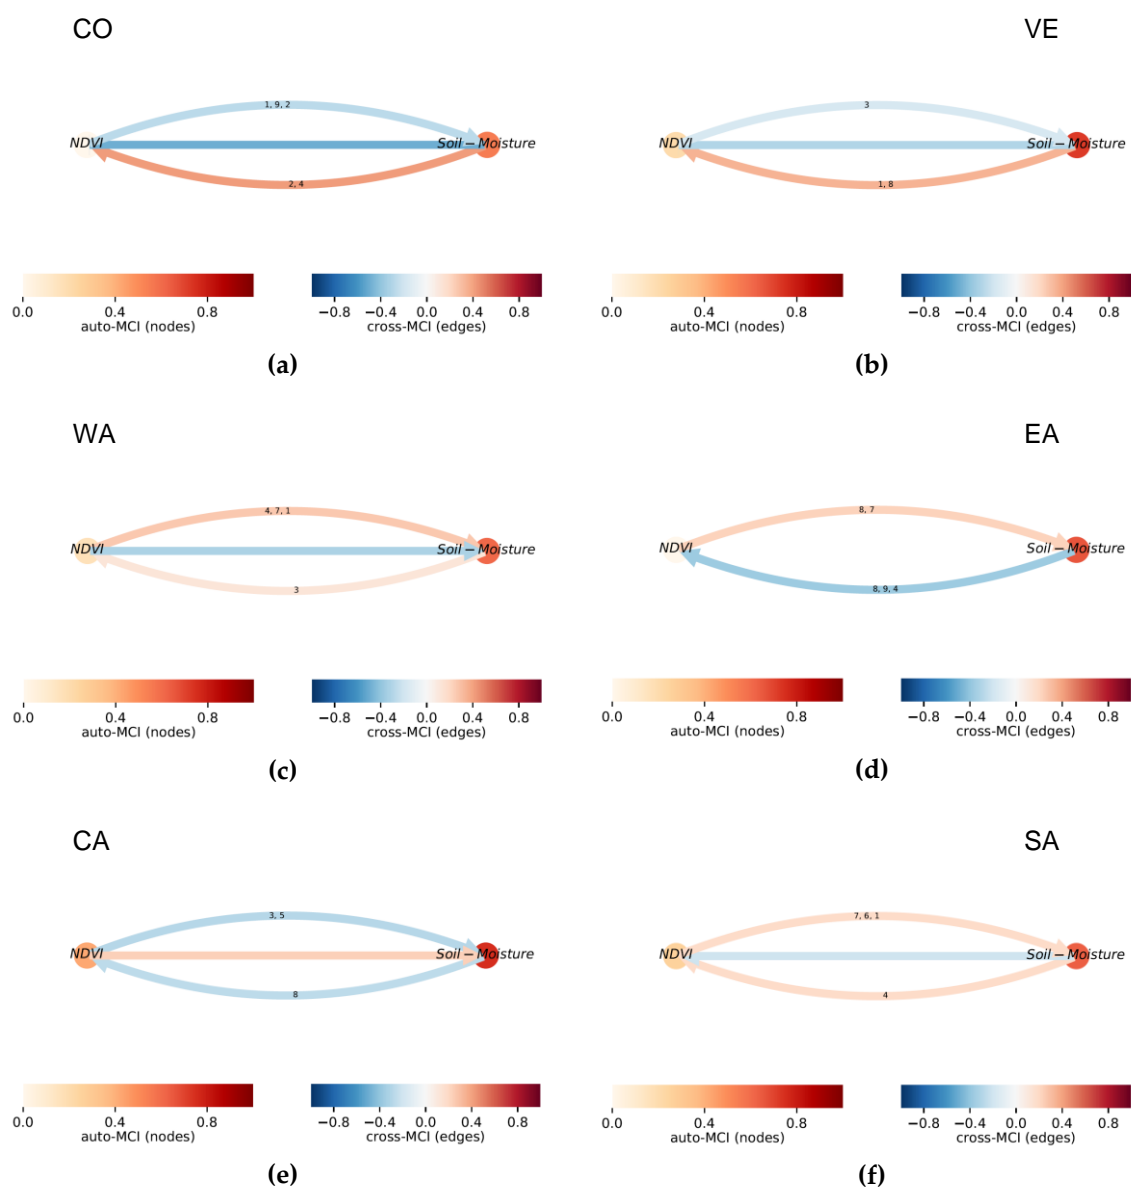

**Figure S9.** Non-linear causality analysis with PCMCIPLUS method between NDVI and SMOS raw series. **(a)** CO – Colombia, **(b)** VE – Venezuela, **(c)** WA – West Amazonia, **(d)** EA – East Amazonia, **(e)** CA – Center Amazonia and **(f)** SA – South Amazonia.

**Table S2.** Non-linear causality correlations and causality results for PCMCIplus method.

|                                  |      | CO    | VE   | WA    | CA     | SA     | EA     |
|----------------------------------|------|-------|------|-------|--------|--------|--------|
| Auto MCI                         | SMOS | 0.6   | 0.8  | 0.6   | 0.8    | 0.6    | 0.6    |
|                                  | NDVI | 0.1   | 0.2  | 0.2   | 0.4    | 0.2    | 0.1    |
| Sim. co-dependency <sup>1</sup>  |      | -0.4  | -0.6 | -0.2  | -0.2   | 0.2    | -0.1   |
| Sim. co-dependency direction     |      | -     | -    | -     | N to S | N to S | S to N |
| Cross-MCI direction <sup>2</sup> |      | -     | Both | Both  | Both   | Both   | Both   |
| Cross-MCI correlation            | SMOS | 0.6   | 0.4  | 0.2   | -0.2   | 0.2    | -0.4   |
|                                  | NDVI | -0.2  | -0.1 | 0.4   | -0.2   | 0.2    | 0.2    |
| Cross-MCI lag*                   | SMOS | 2,4   | 1,8  | 3     | 8      | 4      | 8,9,4  |
|                                  | NDVI | 1,9,2 | 3    | 4,7,1 | 3,5    | 7,6,1  | 8,7    |

<sup>1</sup> Simultaneous non-linear co-dependency, \* Direction refers to N= NDVI and S= SMOS

<sup>2</sup> Cross-MCI lag refers to the lag between both series where a correlation is presented (measured in months).

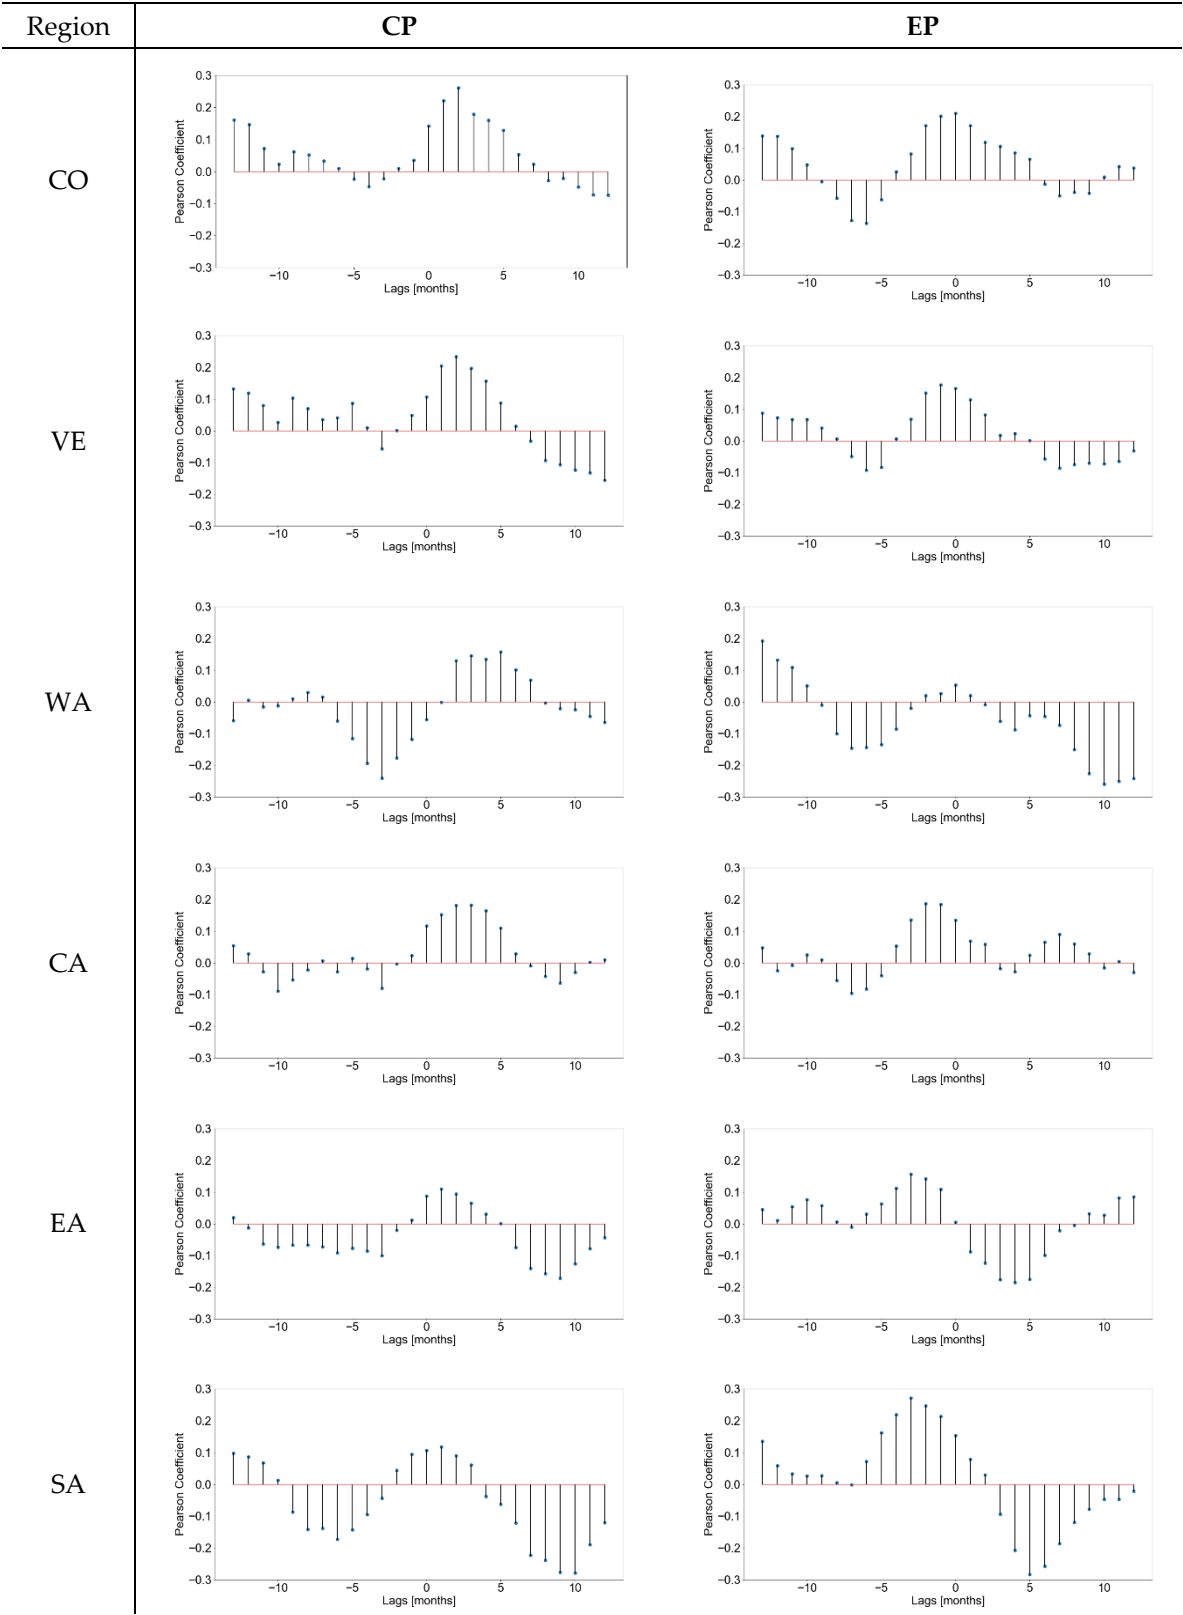

**Figure S10.** Comparison between NDVI correlations with ENSO CP and EP indices.

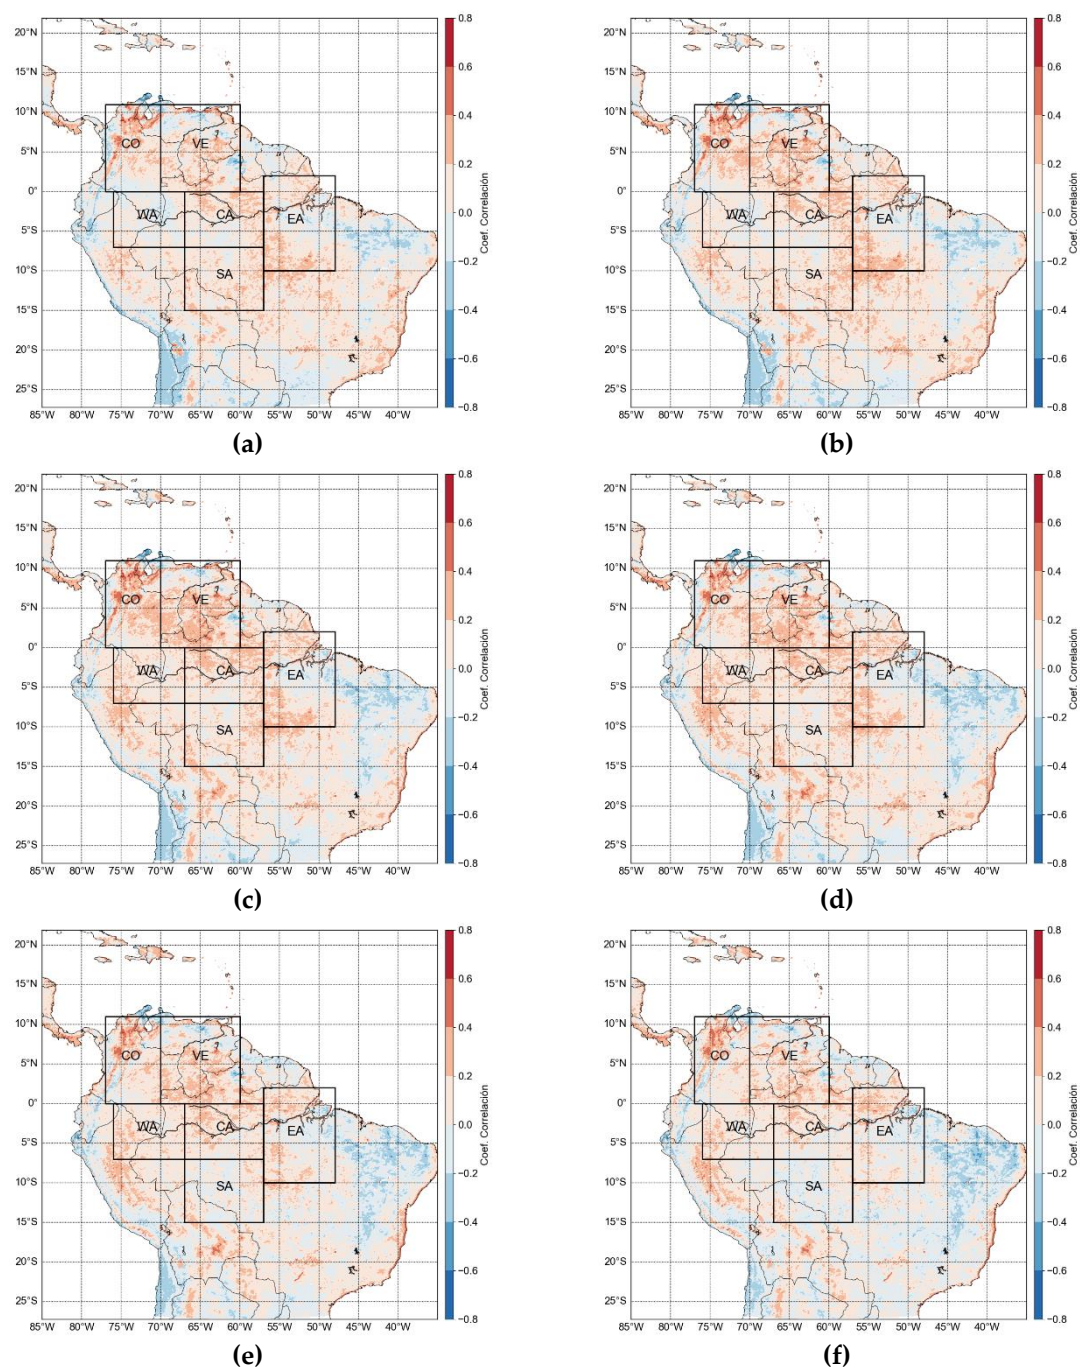

**Figure S11.** Spatial lagged-correlations between the CP index (leading) and standardized NDVI (lagging) monthly data: (a) 0 lag; (b) 1-month lag; (c) 2-months lag; (d) 3-months lag; (e) 4-months lag; and (f) 5-months lag.

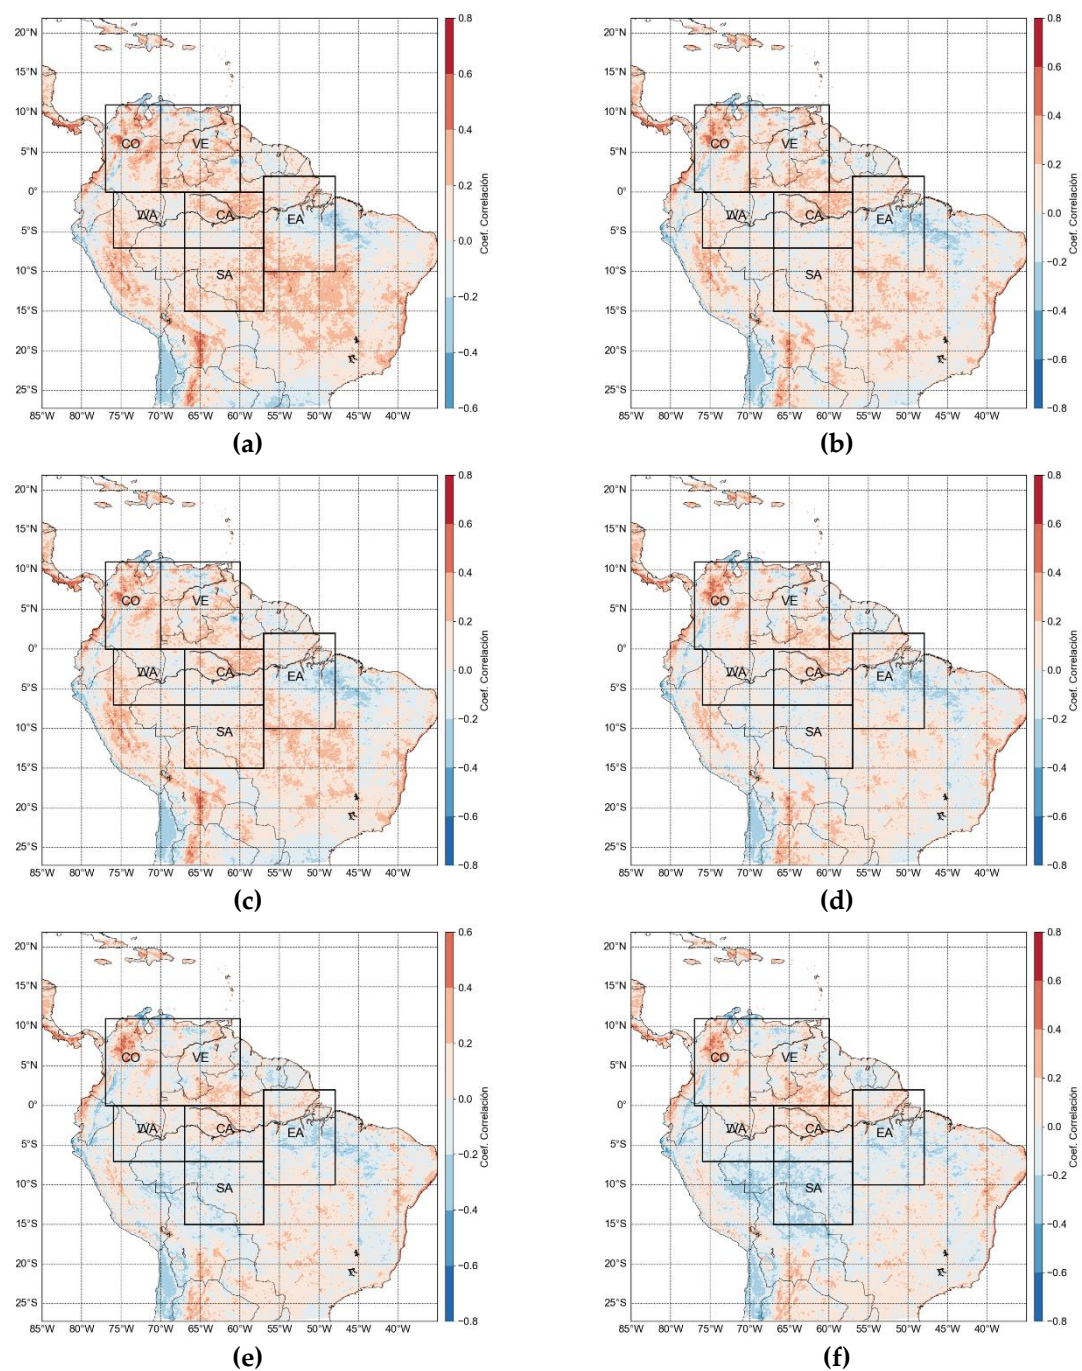

**Figure S12.** Spatial lagged-correlations between the EP index (leading) and standardized NDVI (lagging) monthly data: (a) 0 lag; (b) 1-month lag; (c) 2-months lag; (d) 3-months lag; (e) 4-months lag; and (f) 5-months lag.

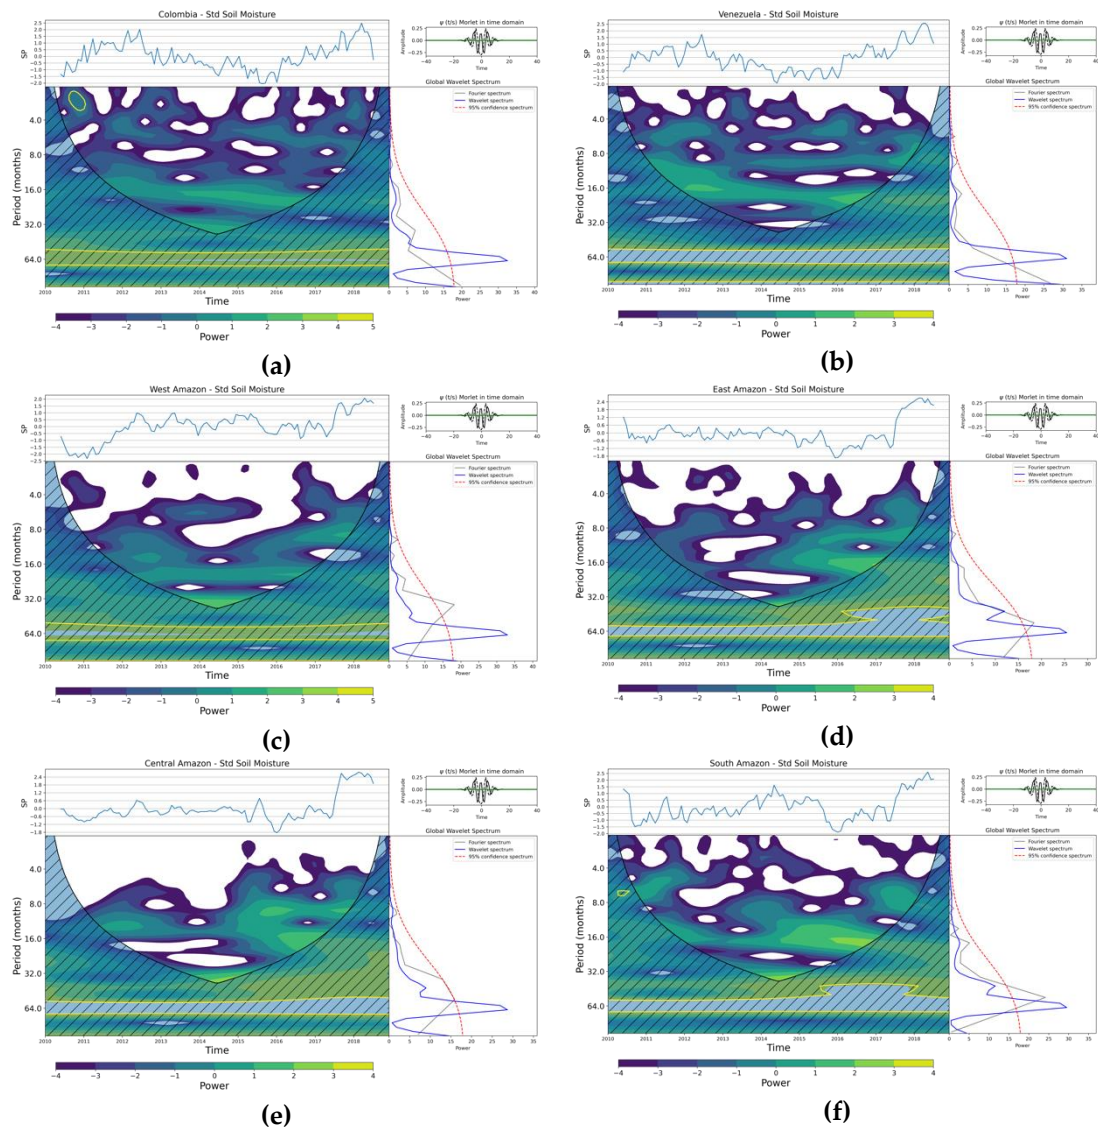

**Figure S13.** SMOS standardized series Wavelets: (a) Colombia; (b) Venezuela; (c) West Amazon; (d) East Amazon; (e) Central Amazon; (f) South Amazon.

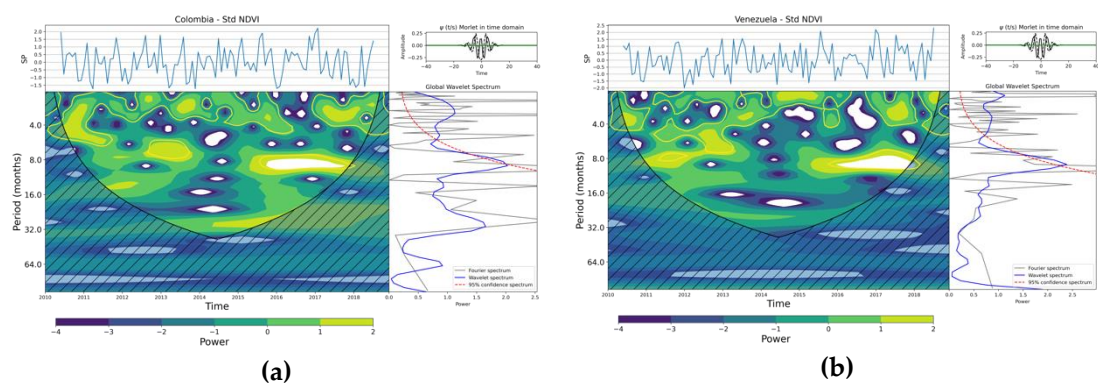

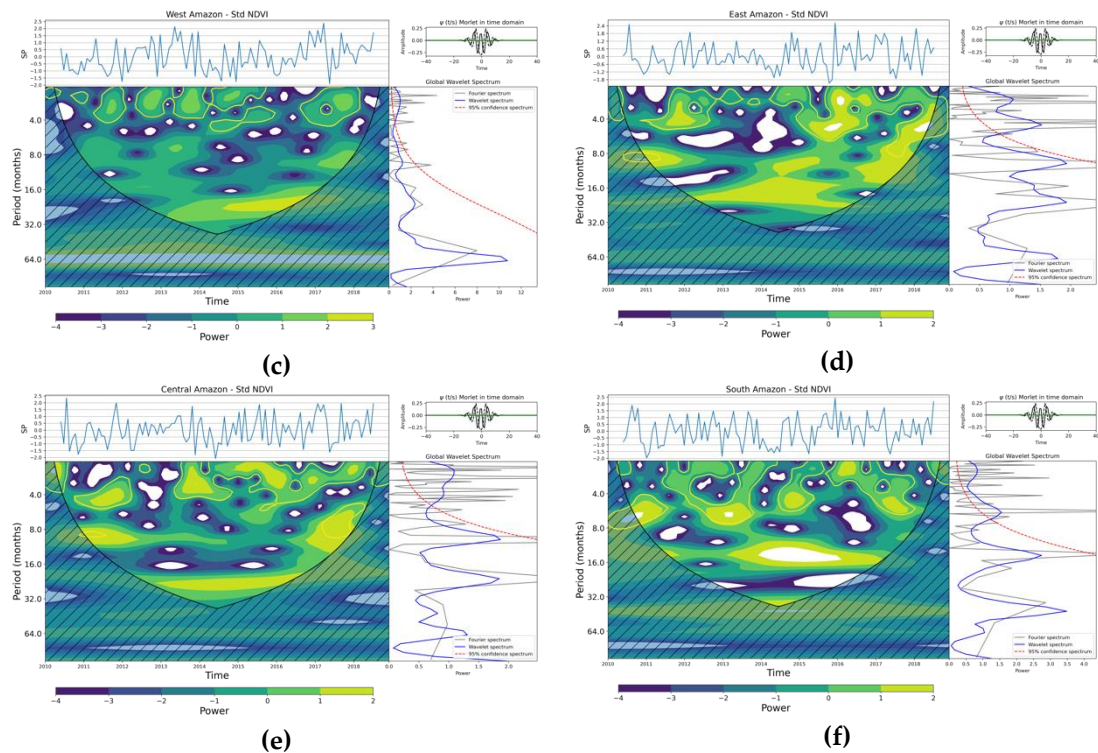

**Figure S14.** NDVI standardized series Wavelets: (a) Colombia; (b) Venezuela; (c) West Amazon; (d) East Amazon; (e) Central Amazon; (f) South Amazon.

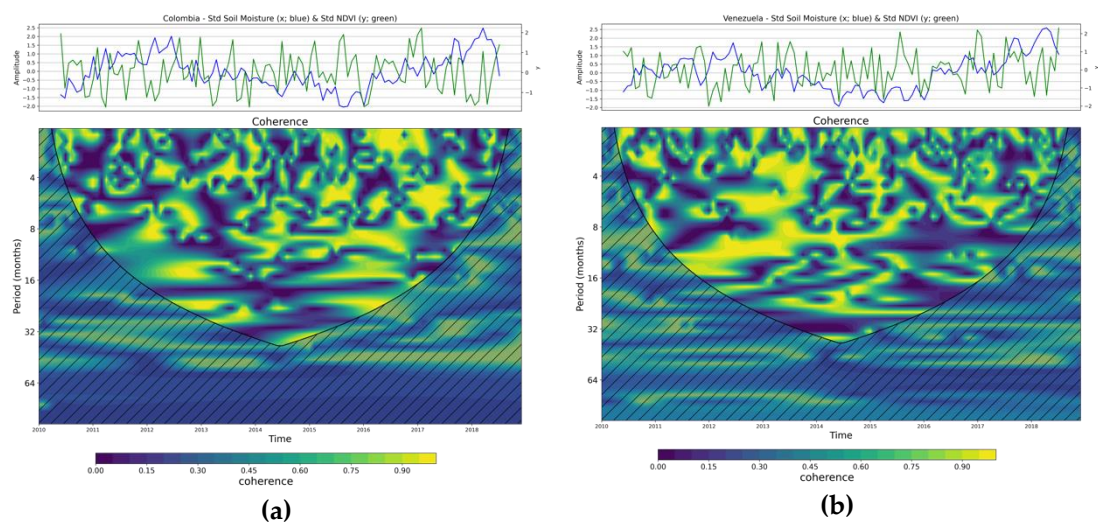

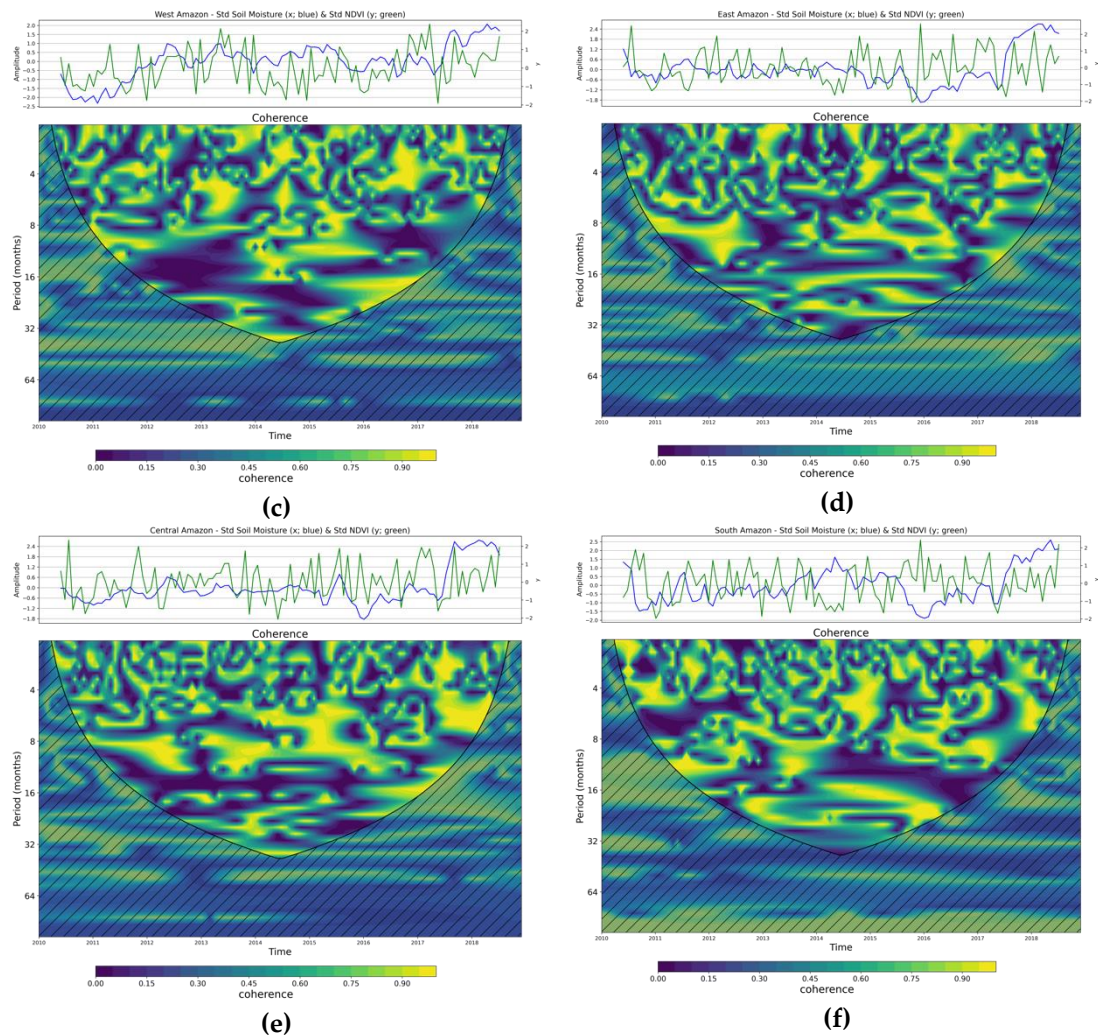

**Figure S15.** Wavelet coherence analyses between standardized series of NDVI and SMOS for the six studied regions. The linear color scale results go from deep blue (WCO=0) to yellow (WCO=1): (a) Colombia; (b) Venezuela; (c) West Amazon; (d) East Amazon; (e) Central Amazon; (f) South Amazon.

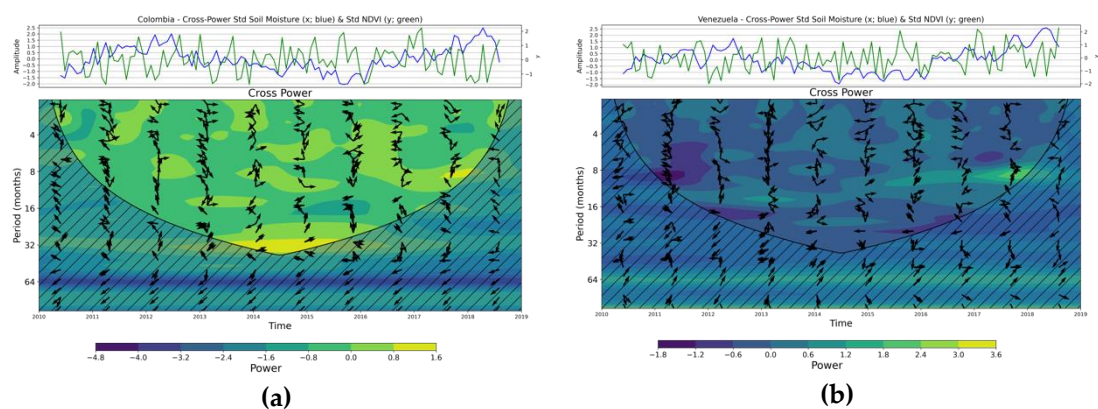

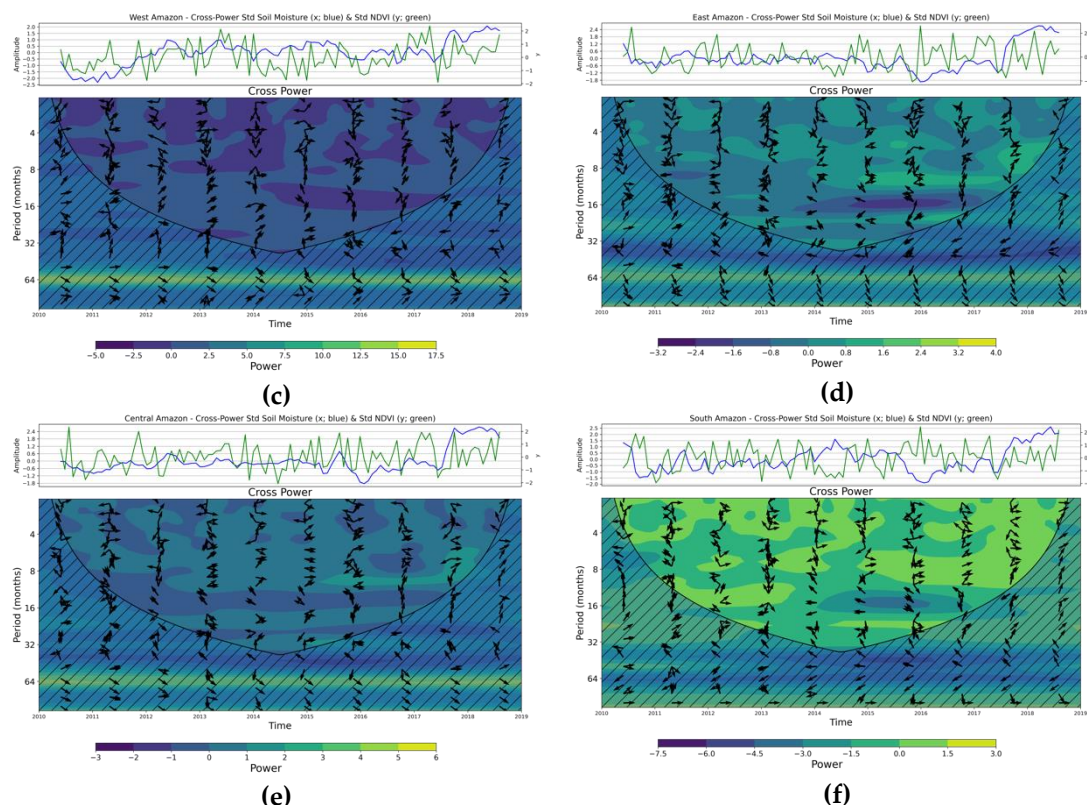

**Figure S16.** Wavelet cross-spectra analyses between standardized series of NDVI and SMOS for the six studied regions. Arrows pointing to the right denote that both series are in phase, whereas arrows pointing to the left denote that both series are out of phase: (a) Colombia; (b) Venezuela; (c) West Amazon; (d) East Amazon; (e) Central Amazon; (f) South Amazon.

**Table S3.** Non-linear correlations and causality results for CP index, ParrCorr method.

|                                           |      | CO      | VE   | WA   | CA  | SA      | EA      |
|-------------------------------------------|------|---------|------|------|-----|---------|---------|
| Auto MCI                                  | SMOS | 0.6     | 0.6  | 0.6  | 0.6 | 0.6     | 0.6     |
|                                           | NDVI | 0.1     | 0.4  | 0.4  | 0.1 | 0.1     | 0.1     |
|                                           | CP   | 0.8     | 0.8  | 0.8  | 0.8 | 0.8     | 0.8     |
| Sim. co-dependency <sup>1</sup>           |      | -       | -    | -    | -   | -       | -       |
| Sim. co-dependency direction <sup>2</sup> |      | -       | -    | -    | -   | -       | -       |
| Cross-MCI direction <sup>3</sup>          |      | CP to S | Both | Both | -   | CP to N | CP to S |
| Cross-MCI                                 | SMOS | -0.2    | -0.2 | 0.2  | -   | -       | -0.2    |
|                                           | NDVI | -       | -0.2 | -0.2 | -   | -0.2    | -       |
| Cross-MCI lag*                            | SMOS | 3       | 1    | 5    | -   | -       | 4       |
|                                           | NDVI | -       | 8    | 4.3  | -   | 9       | -       |

<sup>1</sup> Simultaneous non-linear co-dependency, <sup>2</sup> Direction refers to N= NDVI and S= SMOS

<sup>3</sup> Cross-MCI lag refers to the lag between both series where a correlation is presented (measured in months).

**Table S4.** Non-linear correlations and causality results for CP index, PCMCIPUS method.

|                                           |      | CO      | VE  | WA  | CA   | SA  | EA      |
|-------------------------------------------|------|---------|-----|-----|------|-----|---------|
| Auto MCI                                  | SMOS | 0.4     | 0.6 | 0.6 | 0.6  | 0.6 | 0.6     |
|                                           | NDVI | 0.1     | 0.4 | 0.4 | 0.1  | 0.1 | 0.1     |
|                                           | CP   | 0.8     | 0.8 | 0.8 | 0.8  | 0.8 | 0.8     |
| Sim. co-dependency <sup>2</sup> direction |      | -       | -   | -   | Both | -   | -       |
| Sim. co-dependency <sup>1</sup>           | SMOS | -       | -   | -   | -0.2 | -   | -       |
|                                           | NDVI | -       | -   | -   | 0.2  | -   | -       |
| Cross-MCI direction <sup>3</sup>          |      | CP to S | -   | -   | -    | -   | CP to N |
| Cross-MCI                                 | SMOS | -0.2    | -   | -   | -    | -   | -       |
|                                           | NDVI | -       | -   | -   | -    | -   | -0.1    |
| Cross-MCI lag*                            | SMOS | 3       | -   | -   | -    | -   | -       |
|                                           | NDVI | -       | -   | -   | -    | -   | 1       |

<sup>1</sup> Simultaneous non-linear co-dependency, <sup>2</sup> Direction refers to N= NDVI and S= SMOS

<sup>3</sup> Cross-MCI lag refers to the lag between both series where a correlation is presented (measured in months).

**Table S5.** Non-linear correlations and causality results for EP index, ParrCorr method.

|                                           |      | CO  | VE  | WA   | CA      | SA      | EA      |
|-------------------------------------------|------|-----|-----|------|---------|---------|---------|
| Auto MCI                                  | SMOS | 0.4 | 0.6 | 0.6  | 0.6     | 0.6     | 0.4     |
|                                           | NDVI | 0.1 | 0.4 | 0.4  | 0.1     | 0.1     | 0.1     |
|                                           | CP   | 0.9 | 0.9 | 0.9  | 0.9     | 0.9     | 0.9     |
| Sim. co-dependency <sup>2</sup> direction |      | -   | -   | -    | -       | -       | EP to N |
| Sim. co-dependency <sup>1</sup>           | SMOS | -   | -   | -    | -       | -       | -       |
|                                           | NDVI | -   | -   | -    | -       | -       | -0.2    |
| Cross-MCI direction <sup>3</sup>          |      | -   | -   | Both | EP to S | EP to S | -       |
| Cross-MCI                                 | SMOS | -   | -   | -0.2 | -0.2    | -0.2    | -       |
|                                           | NDVI | -   | -   | -0.2 | -       | -       | -       |
| Cross-MCI lag*                            | SMOS | -   | -   | 3    | 5       | 4.6     | -       |
|                                           | NDVI | -   | -   | 8    | -       | -       | -       |

<sup>1</sup> Simultaneous non-linear co-dependency, <sup>2</sup> Direction refers to N= NDVI and S= SMOS

<sup>3</sup> Cross-MCI lag refers to the lag between both series where a correlation is presented (measured in months).

**Table S6.** Non-linear correlations and causality results for EP index, PCMCIPUS method.

|                                           |      | CO  | VE  | WA  | CA      | SA      | EA  |
|-------------------------------------------|------|-----|-----|-----|---------|---------|-----|
| Auto MCI                                  | SMOS | 0.4 | 0.4 | 0.6 | 0.6     | 0.6     | 0.6 |
|                                           | NDVI | 0.2 | 0.2 | 0.2 | 0.1     | 0.1     | 0.1 |
|                                           | CP   | 0.9 | 0.9 | 0.9 | 0.9     | 0.9     | 0.9 |
| Sim. co-dependency <sup>2</sup> direction |      | -   | -   | -   | EP to N | -       | -   |
| Sim. co-dependency <sup>1</sup>           | SMOS | -   | -   | -   | -       | -       | -   |
|                                           | NDVI | -   | -   | -   | -0.1    | -       | -   |
| Cross-MCI direction <sup>3</sup>          |      | -   | -   | -   | EP to S | EP to N | -   |
| Cross-MCI                                 | SMOS | -   | -   | -   | -0.2    | -       | -   |
|                                           | NDVI | -   | -   | -   | -       | 0.2     | -   |
| Cross-MCI lag*                            | SMOS | -   | -   | -   | 5       | -       | -   |
|                                           | NDVI | -   | -   | -   | -       | 3       | -   |

<sup>1</sup> Simultaneous non-linear co-dependency, <sup>2</sup> Direction refers to N= NDVI and S= SMOS

<sup>3</sup> Cross-MCI lag refers to the lag between both series where a correlation is presented (measured in months).
